# Supplementary material
Source: Royal Society of Chemistry journal article supplement (doi:10.1039/d6cp01132b)
Supplement: d6cp01132b1.pdf [file d6cp01132b1.pdf]

## Engineering Halide Composition to Control Structural and Electronic Properties in Bismuth-based Perovskite-Inspired Materials

Michael Zambrano-Angulo<sup>a</sup>, Adriana Pecoraro<sup>a</sup>, Roberto Grisorio,<sup>b</sup> Gian Paolo Suranna,<sup>b</sup> Michele Pavone,<sup>c</sup> Ana Belén Muñoz-García<sup>a,\*</sup>

<sup>a</sup>Department of Physics “E. Pancini”, University of Naples Federico II, Naples 80126, Italy

<sup>b</sup>Department of Civil, Environmental, Land, Construction and Chemistry, Polytechnic University of Bari, Bari 70125, Italy

<sup>c</sup>Department of Chemical Sciences, University of Naples Federico II, Naples 80126, Italy

\*Corresponding author: [anabelen.munozgarcia@unina.it](mailto:anabelen.munozgarcia@unina.it)

### Supporting Information

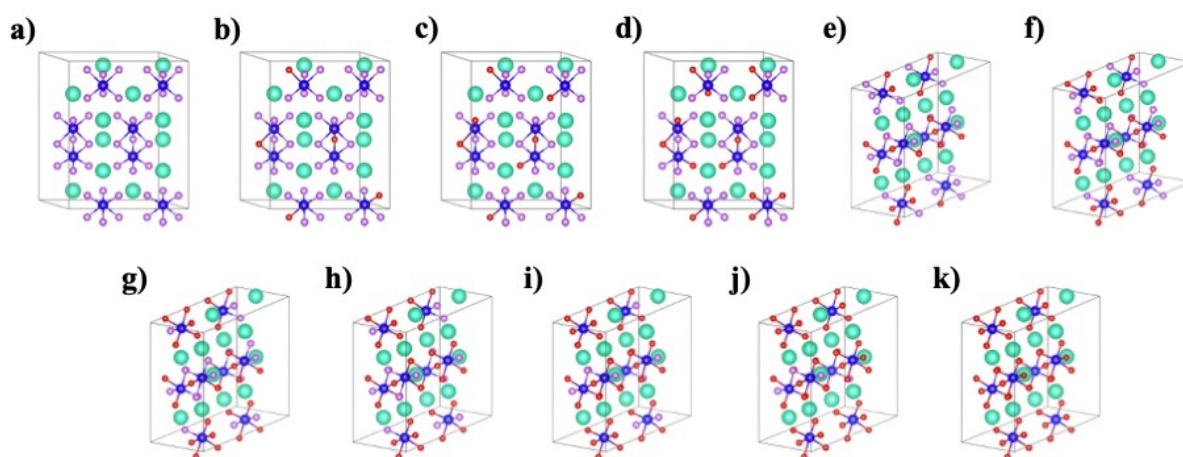

**Figure S1.** Optimized supercell structures of pure iodine and Br-doped compositions at various concentrations. (a) Pure iodine and Br doping levels of (b) 11%, (c) 19%, and (d) 31% in the  $P6_3/mmc$  phase; and (e) 39%, (f) 50%, (g) 61%, (h) 69%, (i) 81%, (j) 89%, and (k) 100% in the  $P-3m1$  phase. Color code: Bi (blue), Cs (cyan), Br (red), and I (light purple)

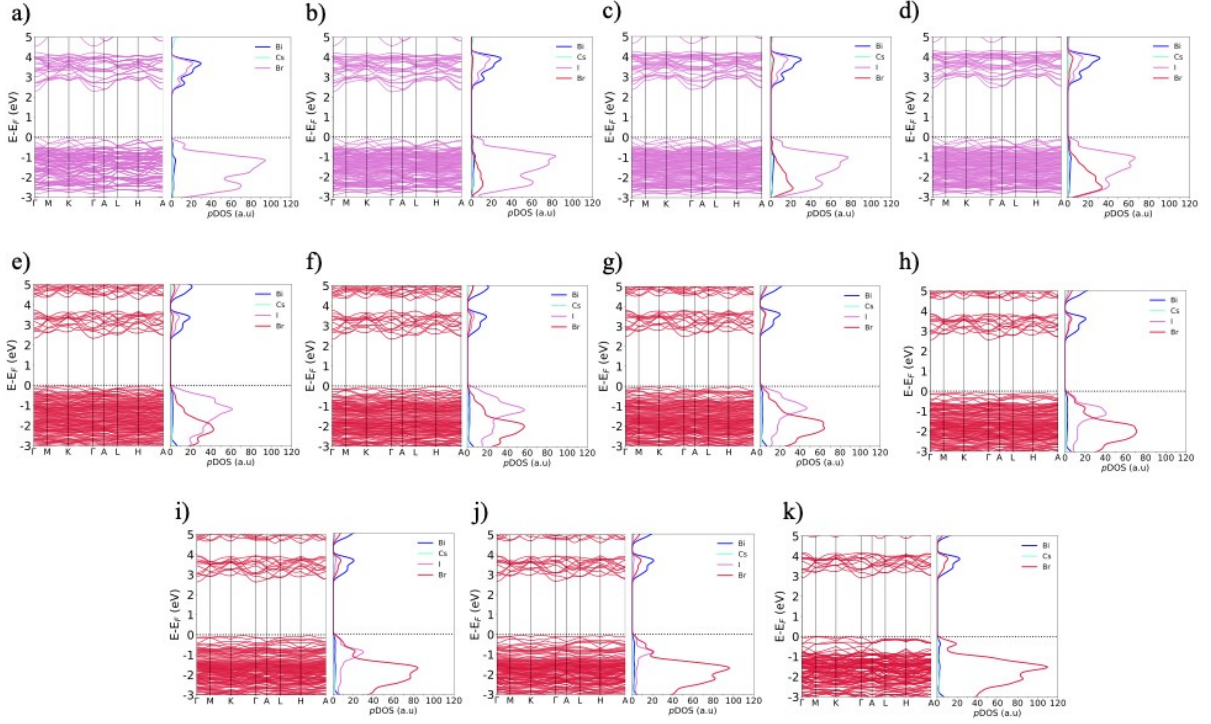

**Figure S2.** Electronic band structures and projected density of states (PDOS) for pure iodine and Br-doped compositions at different concentrations. (a) Pure iodine and Br doping levels of (b) 11%, (c) 19%, and (d) 31% in the  $P6s/mmc$  phase; and (e) 39%, (f) 50%, (g) 61%, (h) 69%, (i) 81%, (j) 89%, and (k) 100% in the  $P-3m1$  phase. Color code: Bi (blue), Cs (cyan), Br (red), and I (light purple).
